# Supplementary material for: Biallelic variants in MAD2L1BP (p31comet) cause female infertility characterized by oocyte maturation arrest
Source: eLife journal article supplement (doi:10.7554/elife.85649), 2023-06-19
Supplement: supp [file elife-85649-supp-v1.zip]

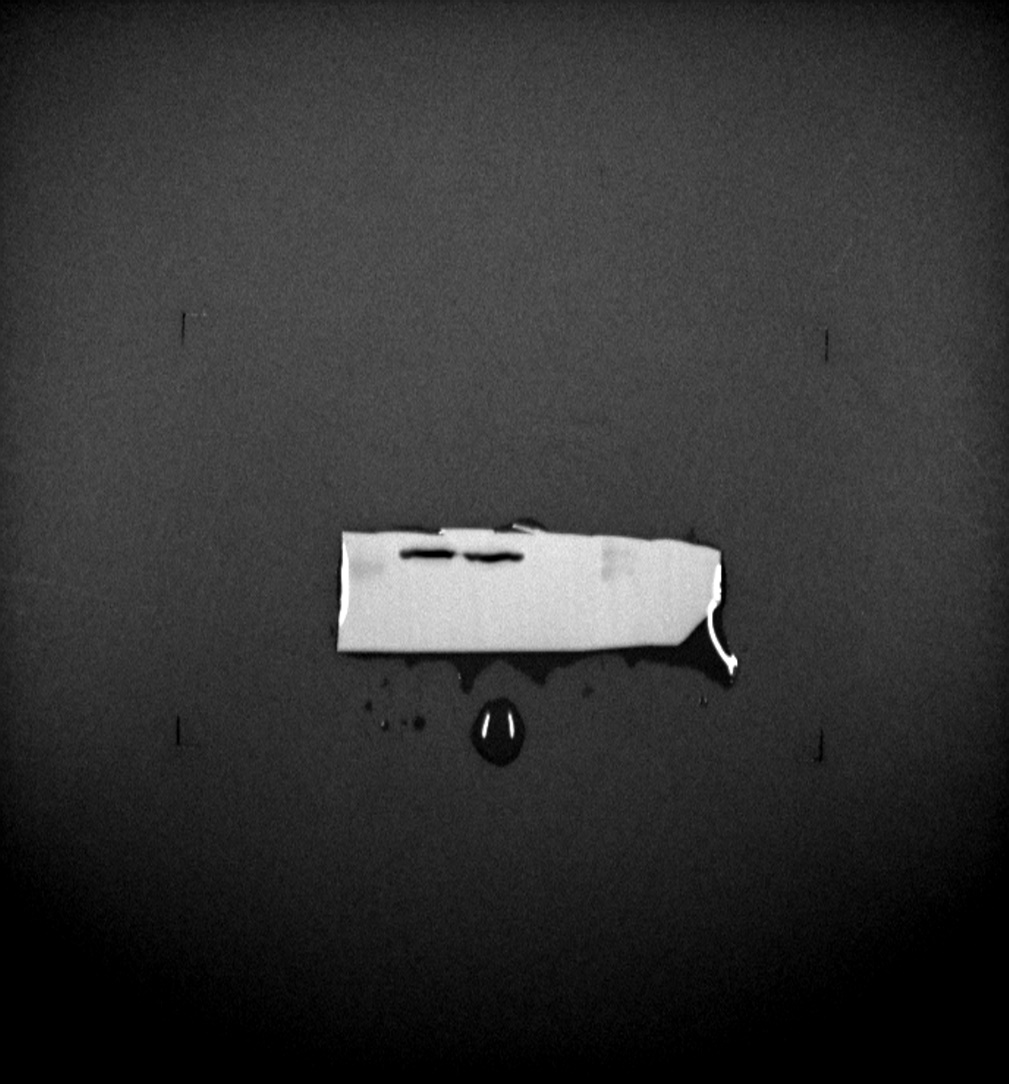

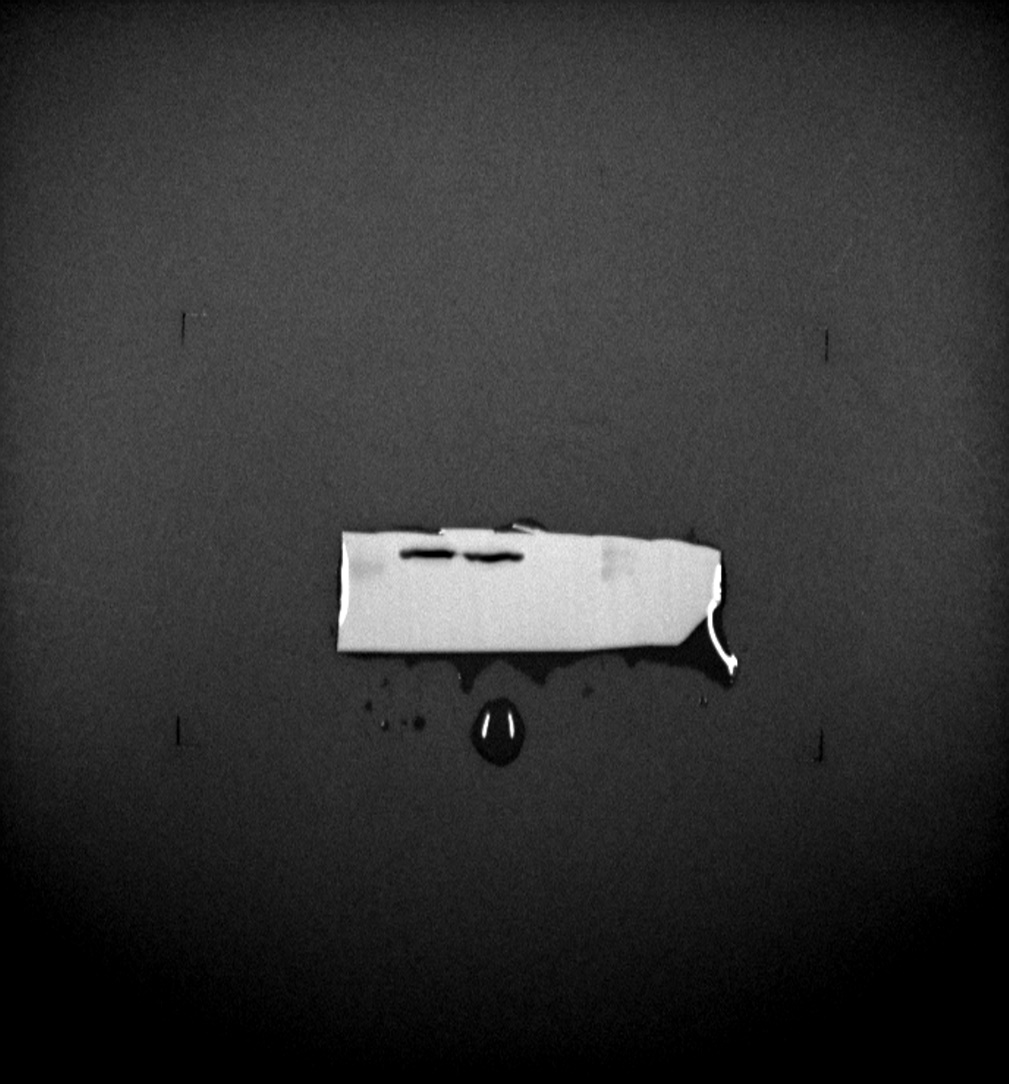

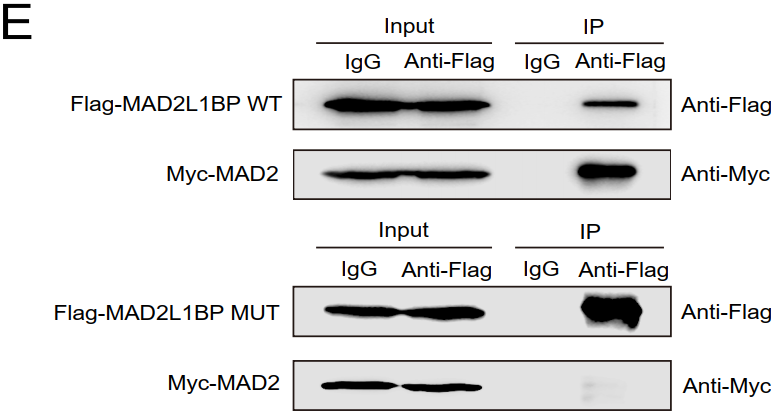

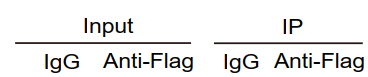

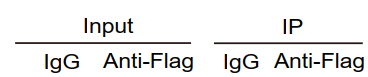

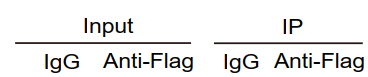

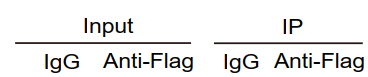

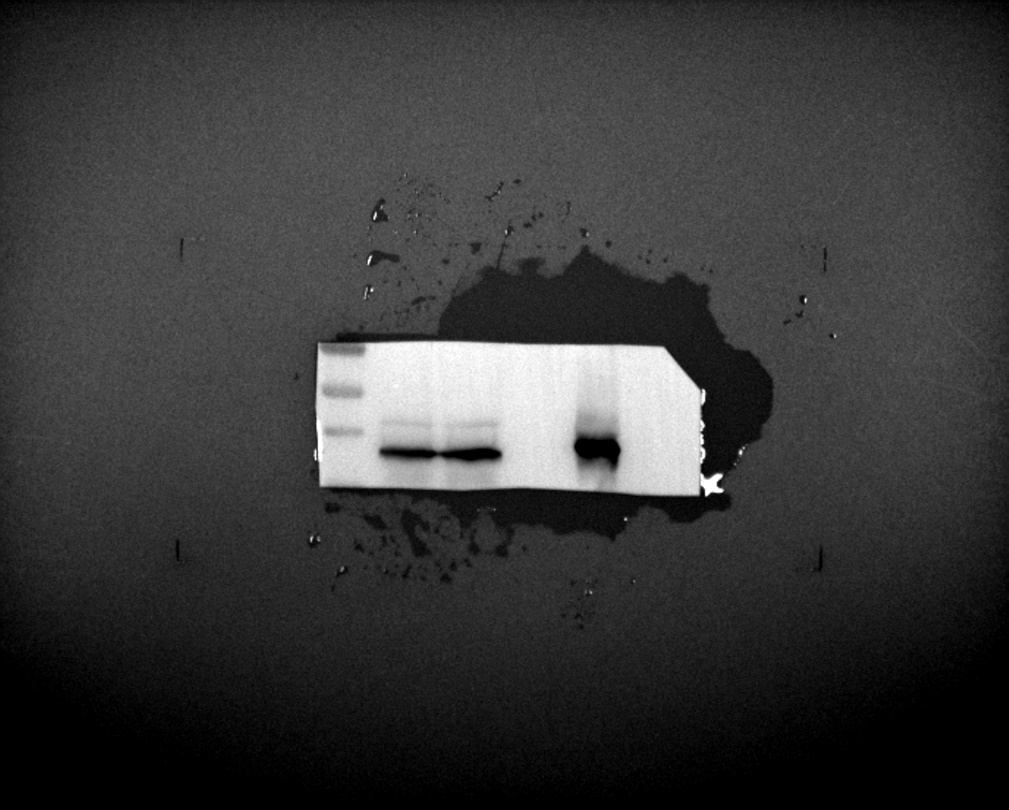

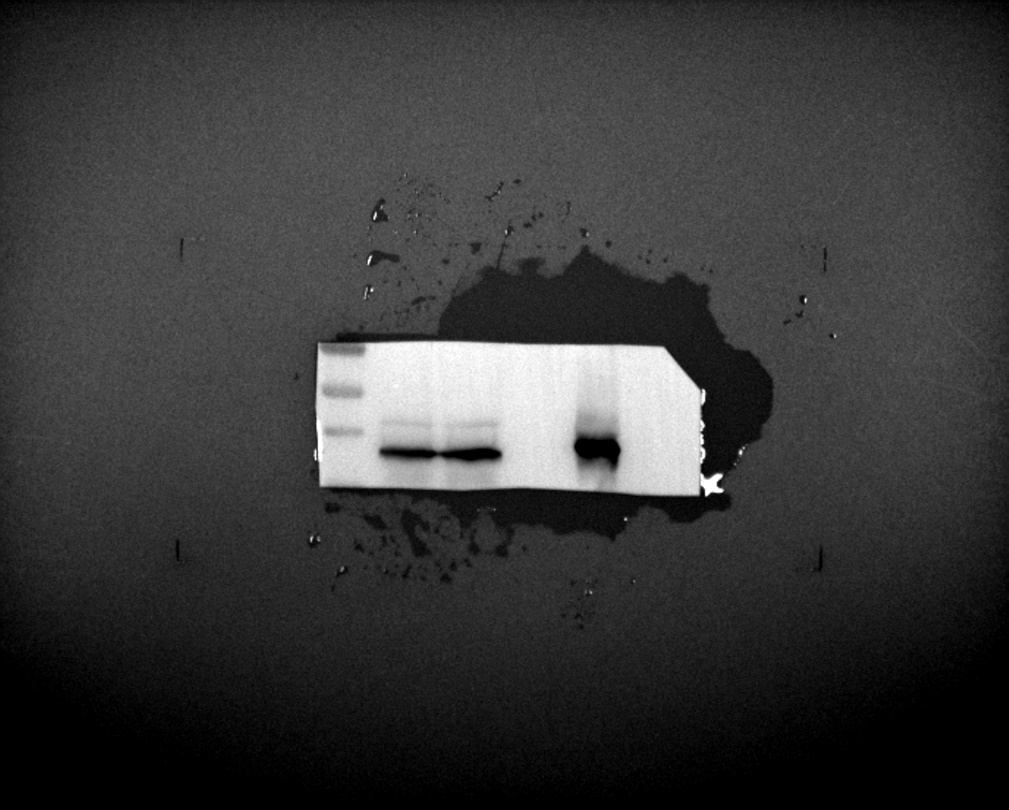

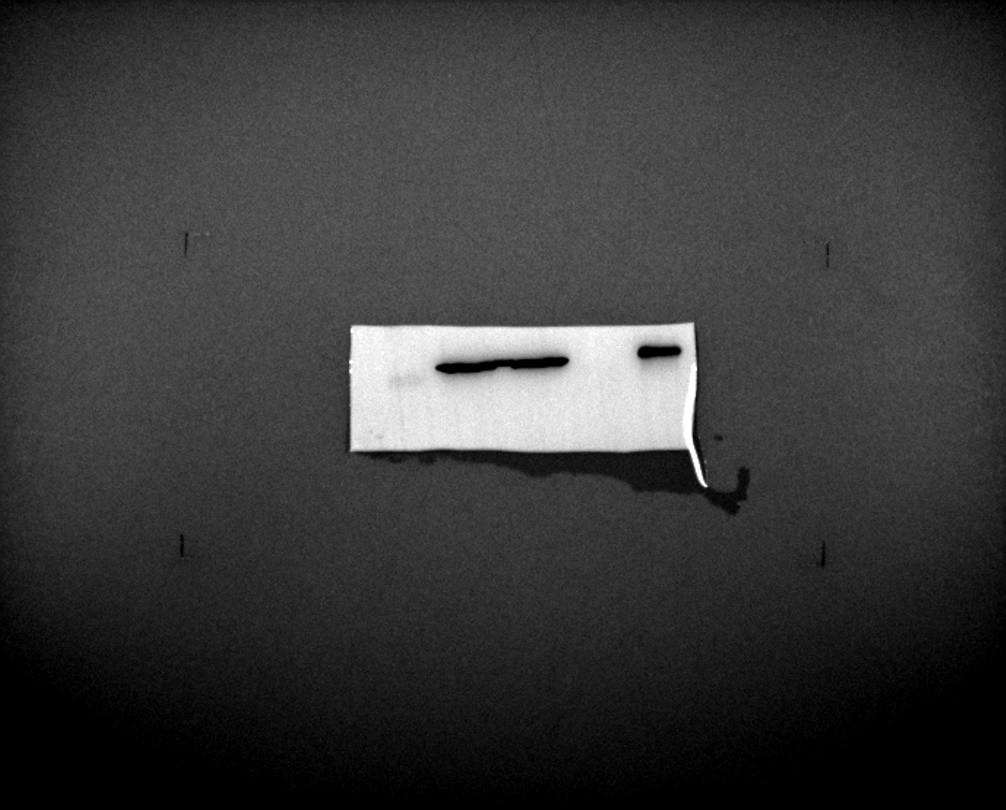

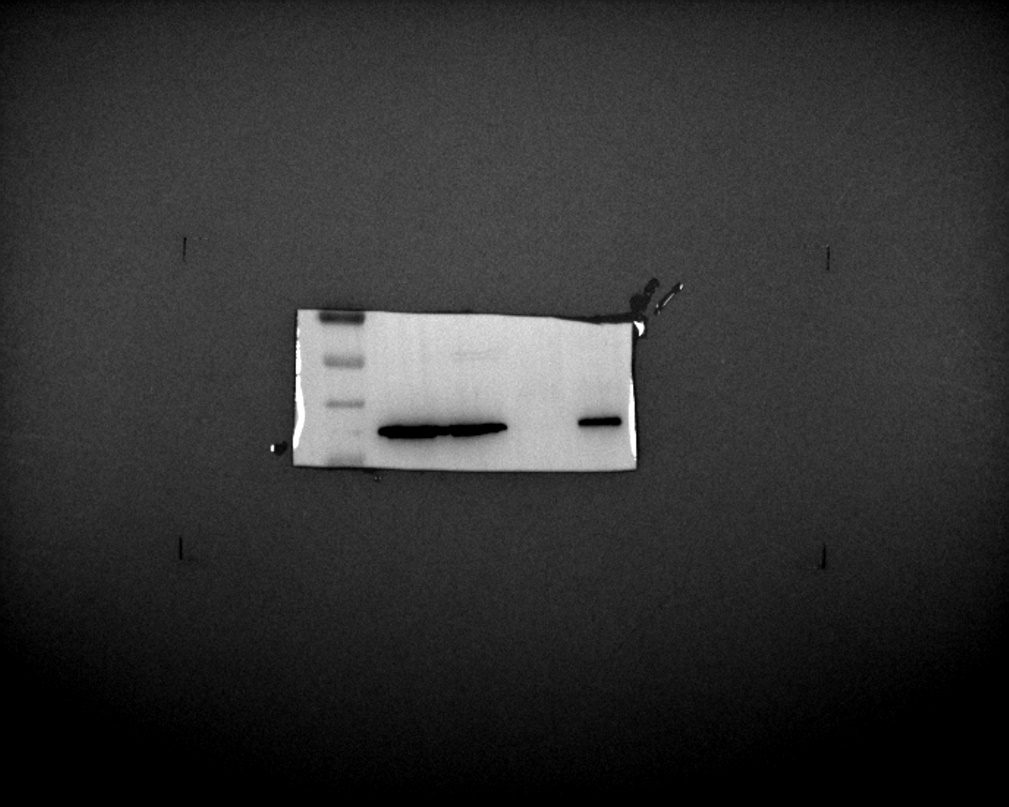

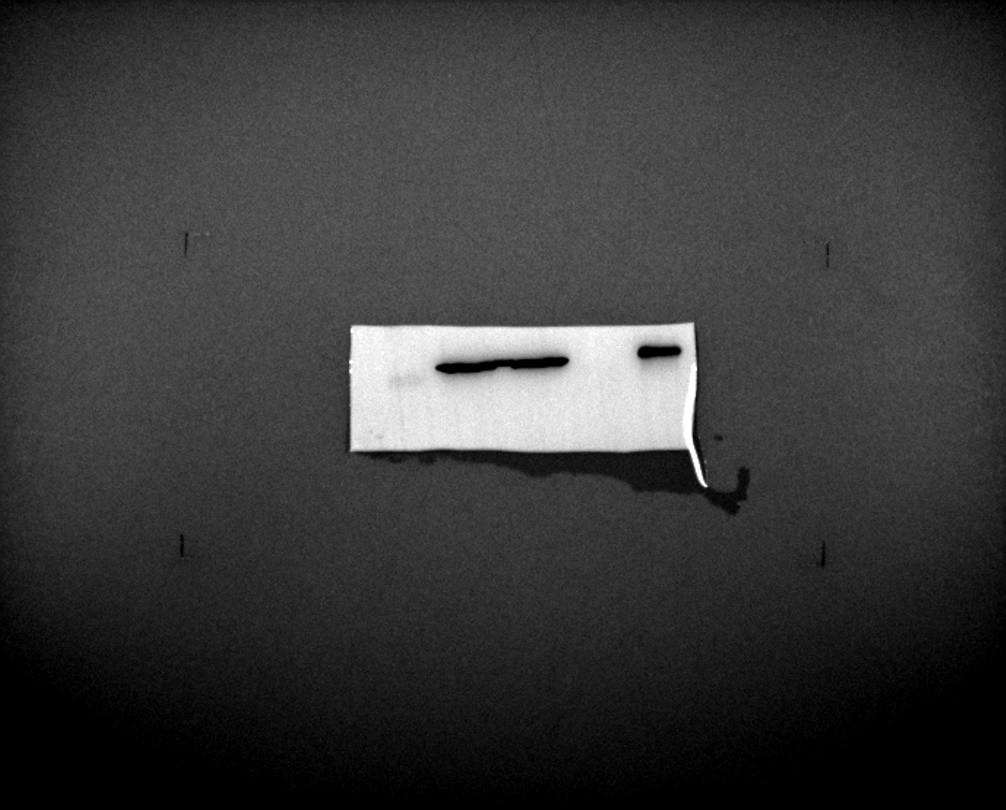

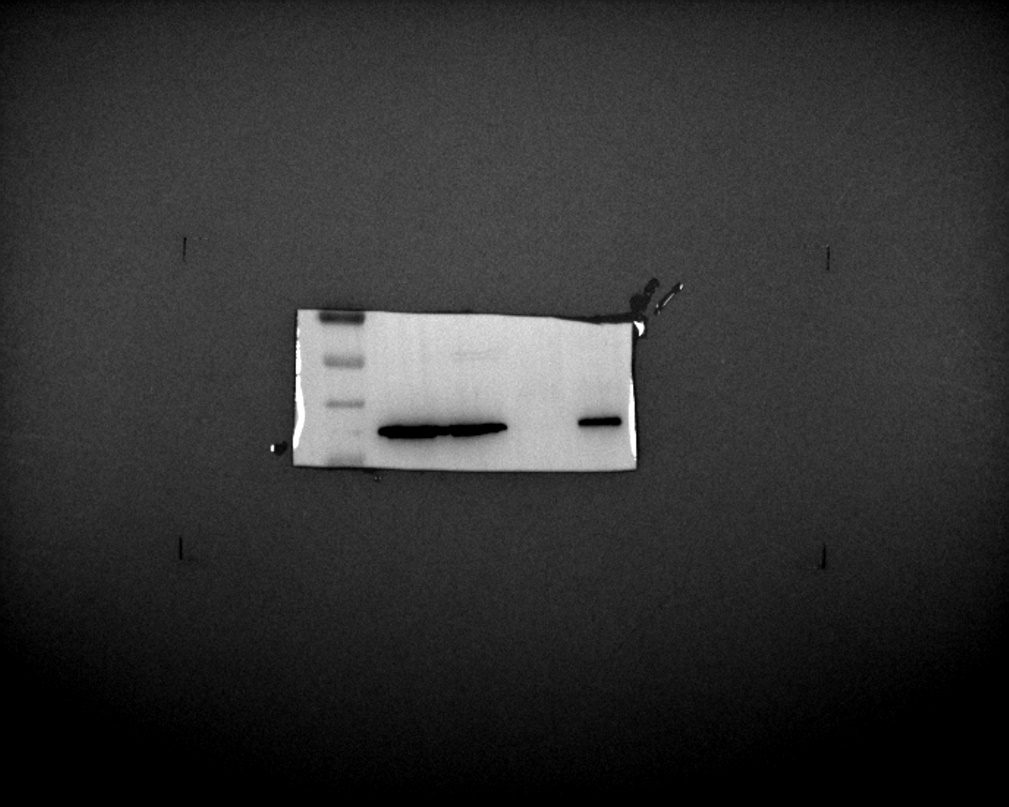


Two parts of the same gel

Two parts of the same gel

Myc-MAD2

Myc-MAD2

Flag-MAD2L1BP WT

Flag-MAD2L1BP MUT

25KD

35KD

70KD

55KD

42KD

35KD

Marker

Marker

35KD

25KD

35KD

42KD

55KD

70KD

Marker

Marker
