# Supplementary material for: Biallelic variants in MAD2L1BP (p31comet) cause female infertility characterized by oocyte maturation arrest
Source: eLife journal article supplement (doi:10.7554/elife.85649), 2023-06-19
Supplement: supp [file Figure 3-source data 1.xlsx]

## Sheet: Sheet1
Non-injected	0h	1h	2h	3h	4h	5h	6h			Non-injected	6h	7h	8h	9h	10h	11h	12h	13h	14h
Ratio of GVBD(rep.1)	0	0.214286	0.357143	0.5	0.7	0.8	0.8			Ratio of PBE(rep.1)	0	0	0	0	0.117647	0.411765	0.647059	0.588235	0.755556
Ratio of GVBD(rep.2)	0	0.35	0.55	0.6	0.8	0.8	0.8			Ratio of PBE(rep.2)	0	0	0	0	0.0588235	0.494118	0.411765	0.742353	0.741176
Ratio of GVBD(rep.3)	0	0.5	0.75	0.8	0.785714	0.785714	0.857143			Ratio of PBE(rep.3)	0	0	0	0	0.133333	0.611111	0.611111	0.777778	0.666667
Ratio of GVBD(rep.4)	0	0.2	0.6	0.7	0.8	0.8	0.8			Ratio of PBE(rep.4)	0	0	0	0	0.0833333	0.416667	0.5	0.875	0.833333
Mean	0	0.316071	0.564286	0.65	0.771429	0.796429	0.814286			Ratio of PBE(rep.5)	0	0	0	0.0416667	0.208333	0.466667	0.52381	0.708333	0.75
STDEV	0	0.140016	0.16215	0.129099	0.0480929	0.00714286	0.0285714			Mean	0	0	0	0.00833333	0.120294	0.480065	0.538749	0.73834	0.749346
										STDEV	0	0	0	0.0186339	0.0571679	0.0809851	0.0932965	0.104498	0.0591512
Injected with Mad2l1bp WT	0h	1h	2h	3h	4h	5h	6h			Injected with Mad2l1bp WT	6h	7h	8h	9h	10h	11h	12h	13h	14h
Ratio of GVBD(rep.1)	0	0.15	0.4	0.5	0.7	0.7	0.7			Ratio of PBE(rep.1)	0	0.133333	0.233333	0.217647	0.714286	0.714286	0.666667	0.833333	0.833333
Ratio of GVBD(rep.2)	0	0.25	0.5	0.7	0.7	0.7	0.736842			Ratio of PBE(rep.2)	0	0.2	0.25	0.358824	0.6	0.7	0.785714	0.7	0.9
Ratio of GVBD(rep.3)	0	0.210526	0.473684	0.526316	0.526316	0.526316	0.65			Ratio of PBE(rep.3)	0	0.0909091	0.0909091	0.333333	0.5	0.633333	0.75	0.928571	0.928571
Ratio of GVBD(rep.4)	0	0.05	0.55	0.65	0.65	0.75	0.85			Ratio of PBE(rep.4)	0.0714286	0.1	0.1	0.4	0.538462	0.607692	0.7	0.833333	0.833333
Mean	0	0.165132	0.480921	0.594079	0.644079	0.669079	0.734211			Mean	0.0178571	0.131061	0.168561	0.327451	0.588187	0.663828	0.725595	0.82381	0.87381
STDEV	0	0.0870777	0.0625473	0.0962447	0.0819706	0.0980506	0.0850018			STDEV	0.0357143	0.049446	0.0847707	0.0781859	0.0936127	0.0514313	0.0527181	0.0939597	0.0481714
Injected with Mad2l1bp Mut	0h	1h	2h	3h	4h	5h	6h			Injected with Mad2l1bp Mut	6h	7h	8h	9h	10h	11h	12h	13h	14h
Ratio of GVBD(rep.1)	0	0.05	0.7	0.8	0.8	0.85	0.95			Ratio of PBE(rep.1)	0	0	0	0	0.0666667	0.166667	0.270588	0.270588	0.270588
Ratio of GVBD(rep.2)	0	0.25	0.65	0.7	0.7	0.75	0.85			Ratio of PBE(rep.2)	0	0	0	0	0	0.3125	0.533333	0.533333	0.533333
Ratio of GVBD(rep.3)	0	0.25	0.5	0.5	0.67	0.75	0.857143			Ratio of PBE(rep.3)	0	0	0	0	0	0.14	0.5	0.5	0.5
Mean	0	0.183333	0.616667	0.666667	0.723333	0.783333	0.885714			Mean	0	0	0	0	0.0222222	0.206389	0.434641	0.434641	0.434641
STDEV	0	0.11547	0.104083	0.152753	0.0680686	0.057735	0.0557875			STDEV	0	0	0	0	0.03849	0.0928572	0.143048	0.143048	0.143048
Injected with GFP	0h	1h	2h	3h	4h	5h	6h			Injected with GFP	6h	7h	8h	9h	10h	11h	12h	13h	14h
Ratio of GVBD(rep.1)	0	0.433333	0.733333	0.833333	0.933333	0.933333	0.933333			Ratio of PBE(rep.1)	0	0	0	0	0.1	0.25	0.6	0.78	0.78
Ratio of GVBD(rep.2)	0	0.366667	0.666667	0.766667	0.866667	0.866667	0.866667			Ratio of PBE(rep.2)	0	0	0	0	0.08	0.32	0.55	0.74	0.79
Ratio of GVBD(rep.3)	0	0.25	0.5	0.666667	0.75	0.823529	0.823529			Ratio of PBE(rep.3)	0	0	0	0	0.12	0.2	0.64	0.82	0.84
Mean	0	0.35	0.633333	0.755556	0.85	0.87451	0.87451			Mean	0	0	0	0	0.1	0.256667	0.596667	0.78	0.803333
STDEV	0	0.0927961	0.120185	0.083887	0.0927961	0.0553205	0.0553205			STDEV	0	0	0	0	0.02	0.0602771	0.0450925	0.04	0.0321455
	0h	1h	2h	3h	4h	5h	6h				6h	7h	8h	9h	10h	11h	12h	13h	14h
Non-injected	0	0.316071	0.564286	0.65	0.771429	0.796429	0.814286			Non-injected	0	0	0	0.00833333	0.120294	0.480065	0.538749	0.73834	0.749346
Injected with Mad2l1bp WT	0	0.165132	0.480921	0.594079	0.644079	0.669079	0.734211			Injected with Mad2l1bp WT	0.0178571	0.131061	0.168561	0.327451	0.588187	0.663828	0.725595	0.82381	0.87381
Injected with Mad2l1bp Mut	0	0.183333	0.616667	0.666667	0.723333	0.783333	0.885714			Injected with Mad2l1bp Mut	0	0	0	0	0.0222222	0.206389	0.434641	0.434641	0.434641
Injected with GFP	0	0.35	0.633333	0.755556	0.85	0.87451	0.87451			Injected with GFP	0	0	0	0	0.1	0.256667	0.596667	0.78	0.803333
