# Supplementary material for: Biallelic variants in MAD2L1BP (p31comet) cause female infertility characterized by oocyte maturation arrest
Source: eLife journal article supplement (doi:10.7554/elife.85649), 2023-06-19
Supplement: supp [file Figure 3-source data 2.xlsx]

## Sheet: Sheet1
	Non-injected				Injected with Mad2				Mad2 + Mad2l1bp WT				Mad2 + Mad2l1bp Mut
	GVBD	PBE			GVBD	PBE			GVBD	PBE			GVBD	PBE
rep.1	0.95	0.8			0.9	0.177778			0.95	0.631579			0.9	0.277778
rep.2	0.9	0.789474			0.8	0.207778			0.9	0.55			0.9	0.277778
rep.3	1	0.894737			0.9	0.222222			1	0.52			0.9	0.222222
rep.4	0.933333	0.714286			0.87	0.12			0.84	0.526316			0.87	0.18
Mean	0.945833	0.799624			0.8675	0.181944			0.9225	0.556974			0.8925	0.239444
STDEV	0.0416667	0.0740096			0.0471699	0.0452553			0.0684957	0.0513859			0.015	0.0475014
					Non-injected	Injected with Mad2	Mad2 + Mad2l1bp WT	Mad2 + Mad2l1bp Mut
				GVBD	0.945833	0.8675	0.9225	0.8925
				PBE	0.799624	0.181944	0.556974	0.239444
