# Supplementary figures and images for: Biallelic variants in MAD2L1BP (p31comet) cause female infertility characterized by oocyte maturation arrest
Source: eLife journal article supplement (doi:10.7554/elife.85649), 2023-06-19

A

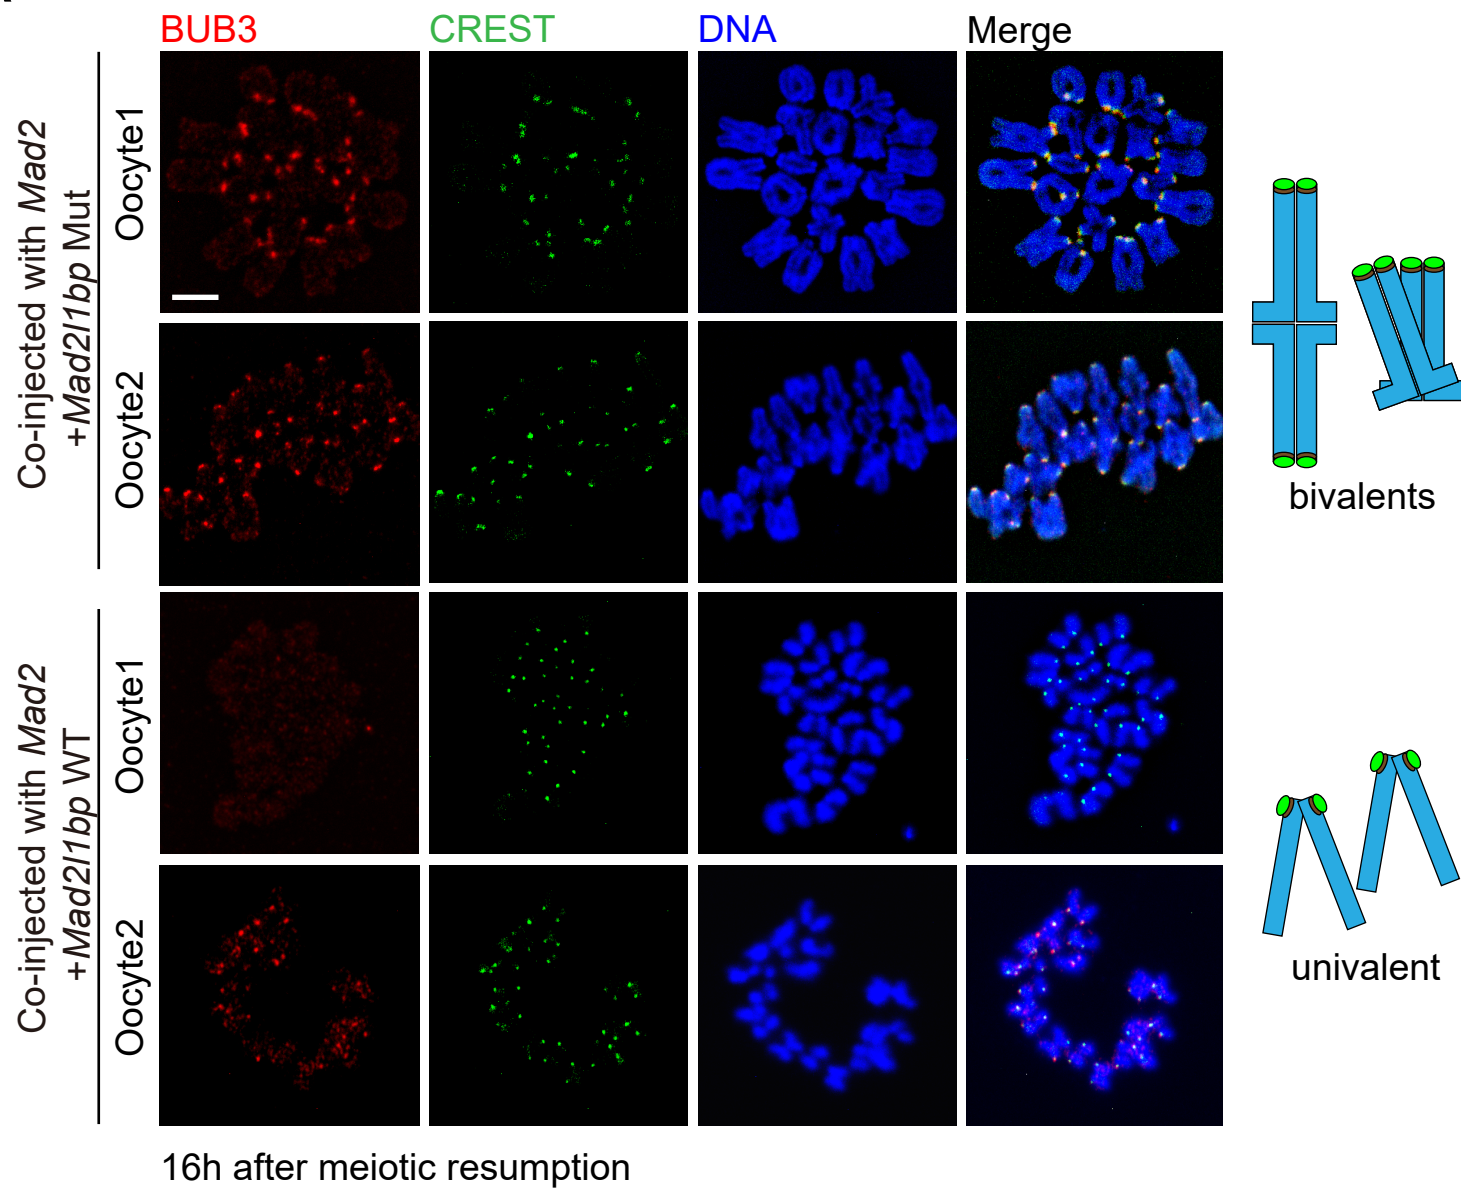

B

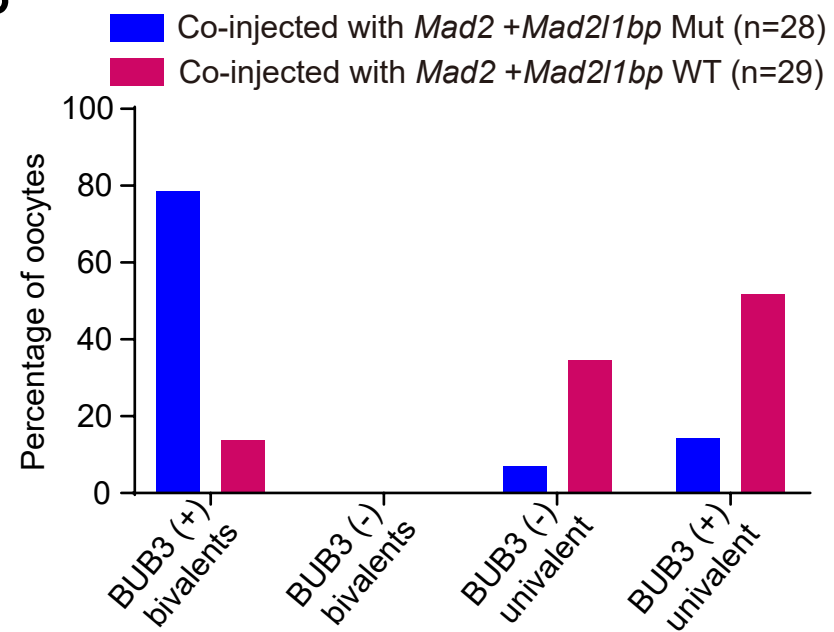

C

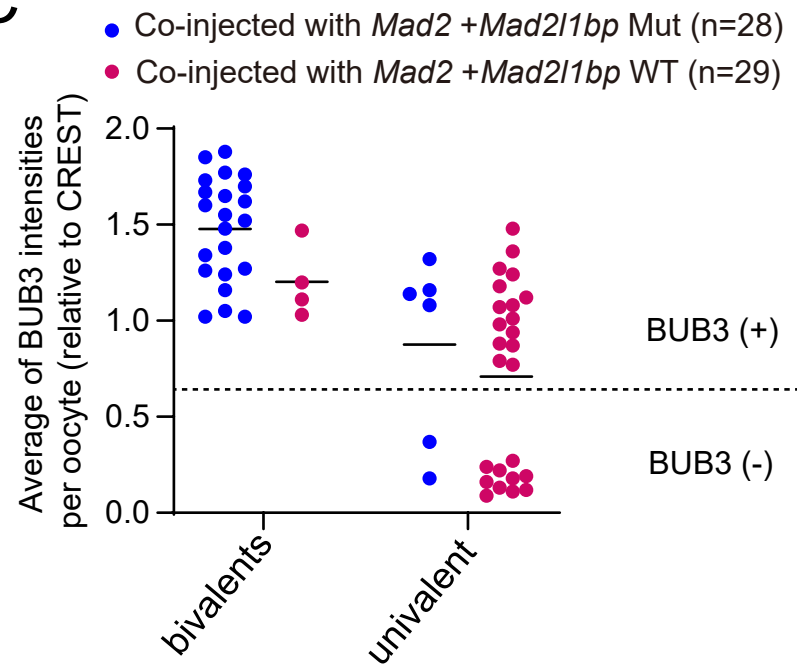

Supplement: supp [file elife-85649-supp-v1.zip]

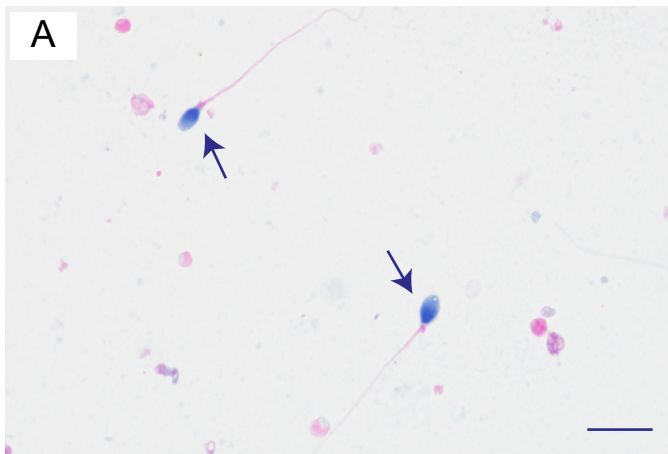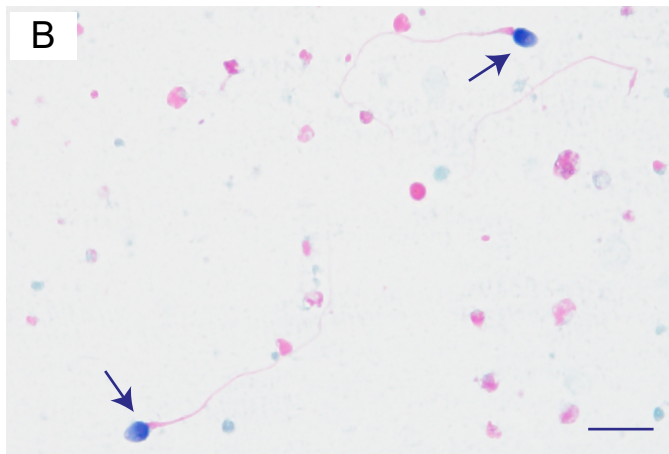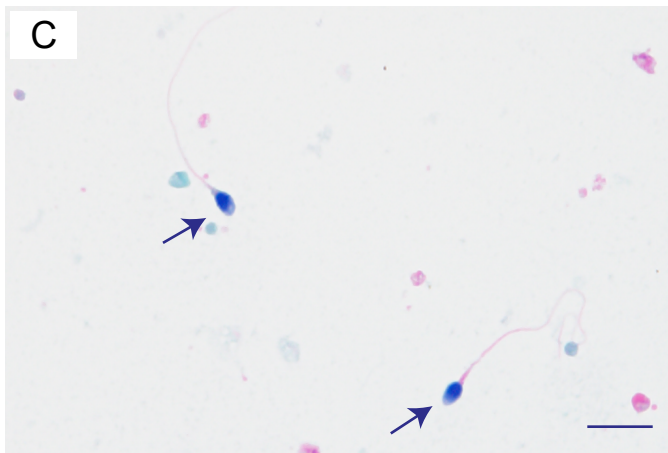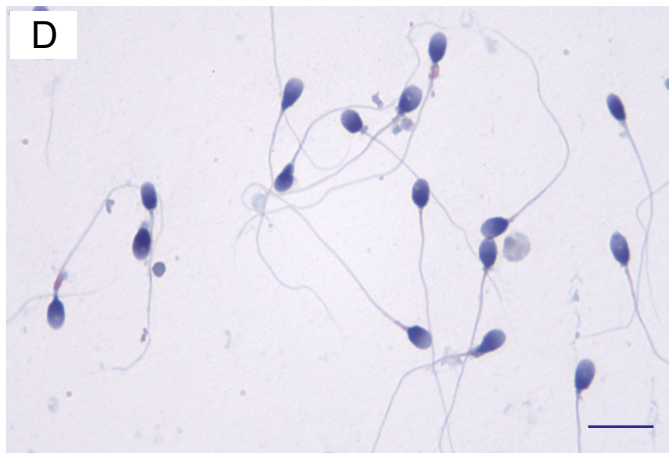

Supplement: supp [file elife-85649-supp-v1.zip]

A

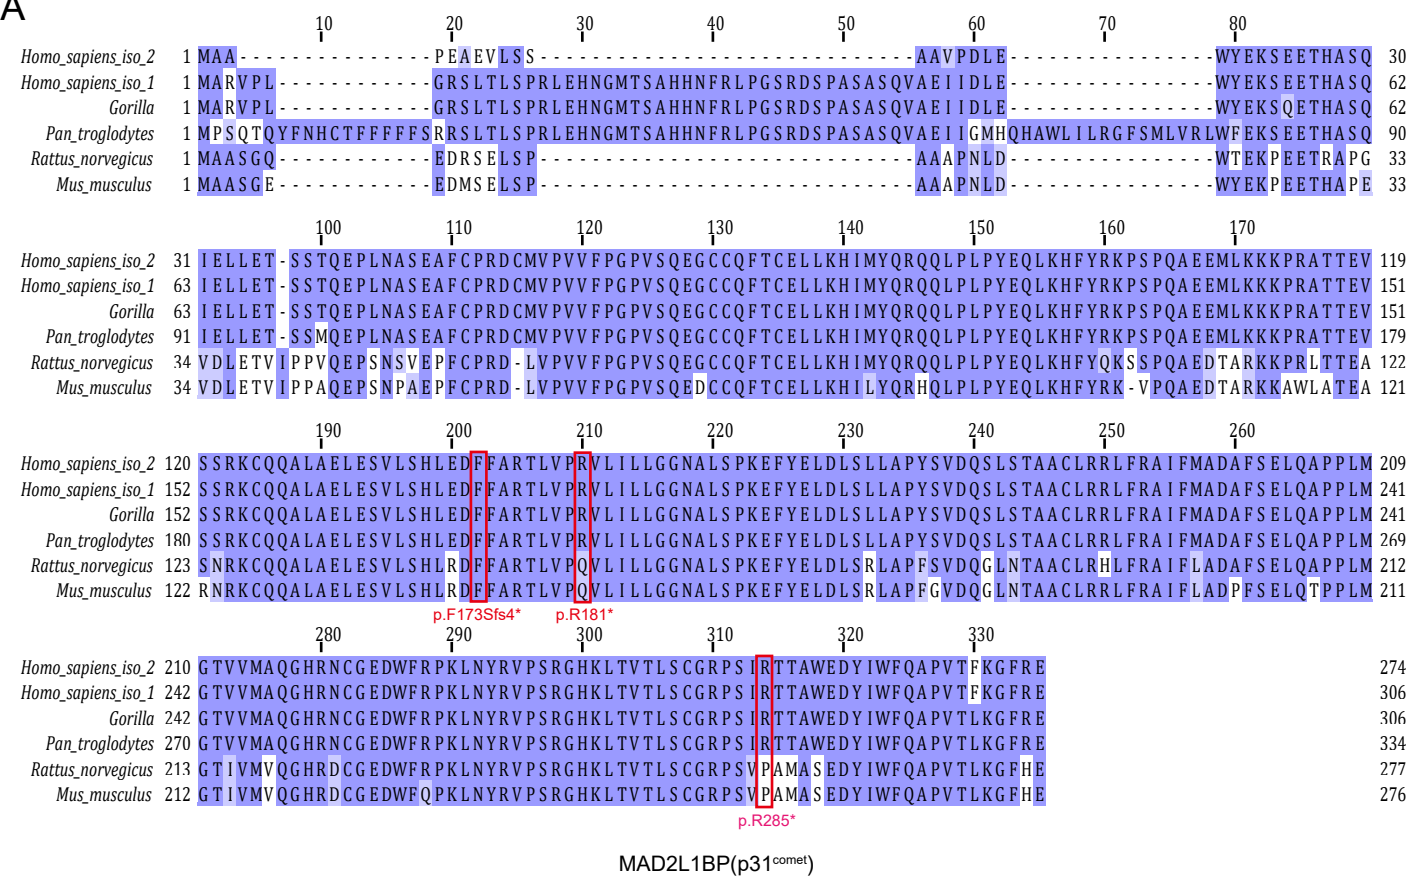

B

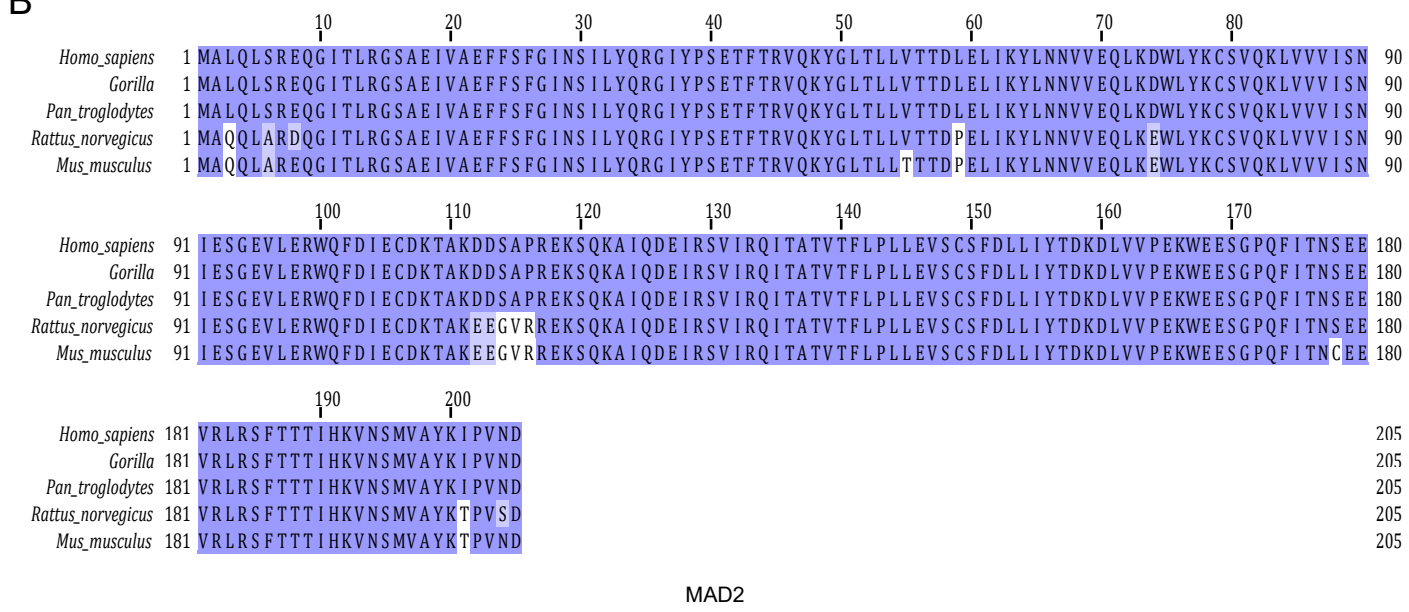

Supplement: supp [file elife-85649-supp-v1.zip]

A

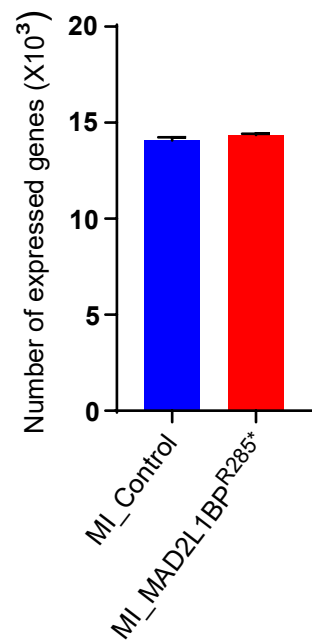

B

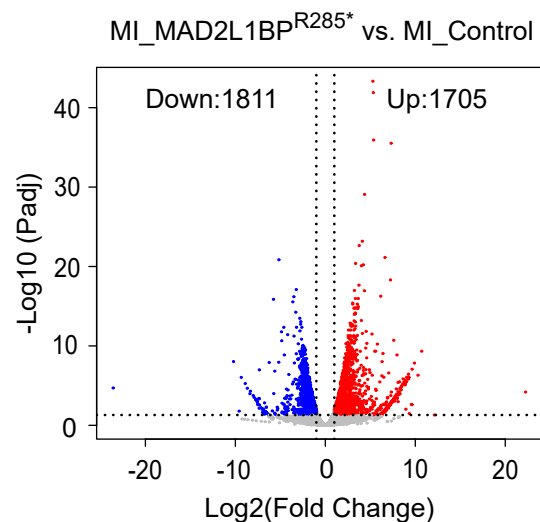

E

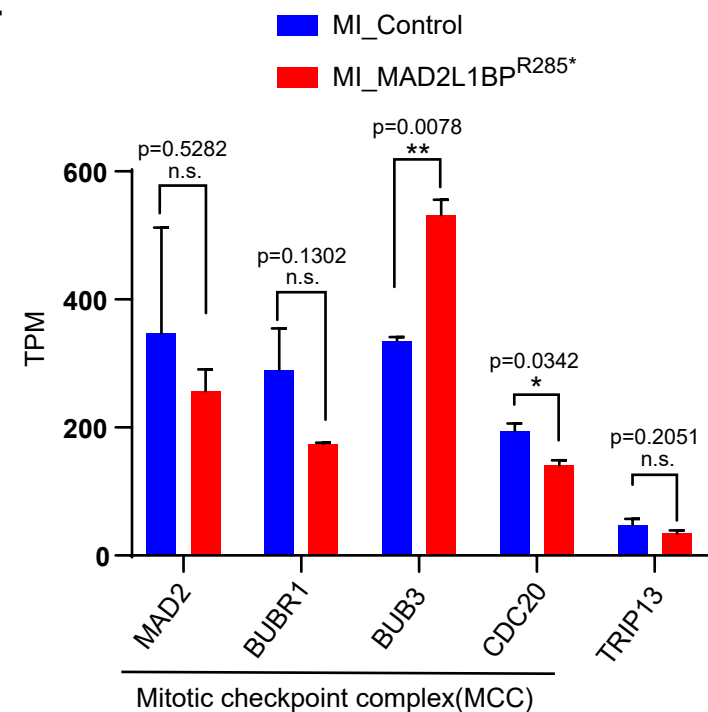

C

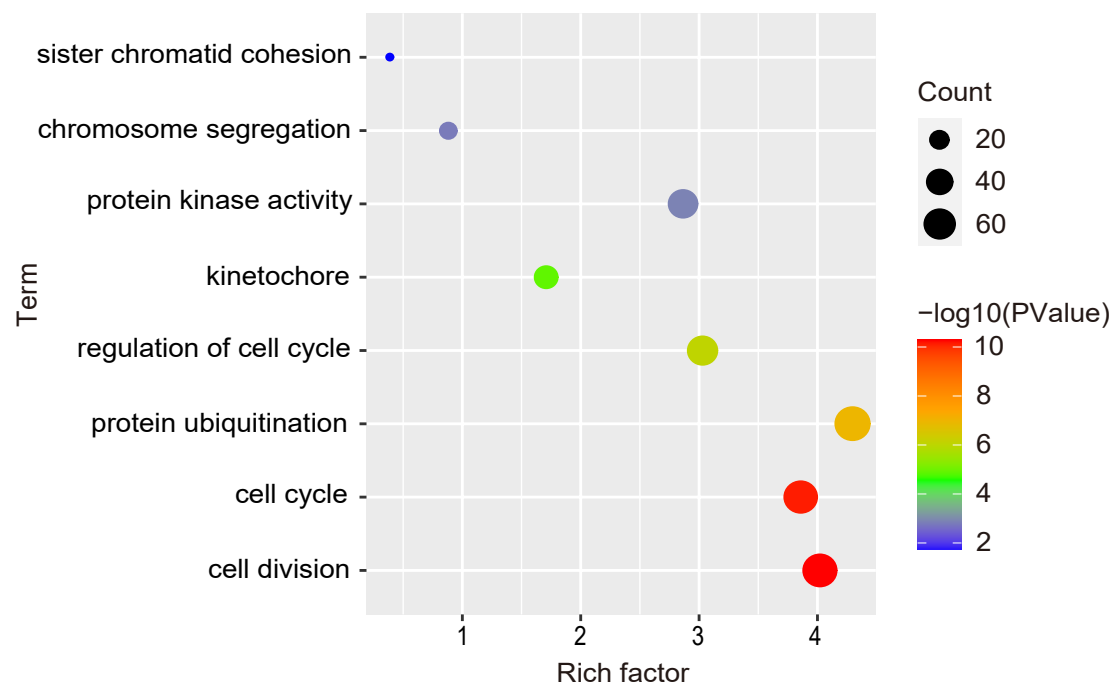

F

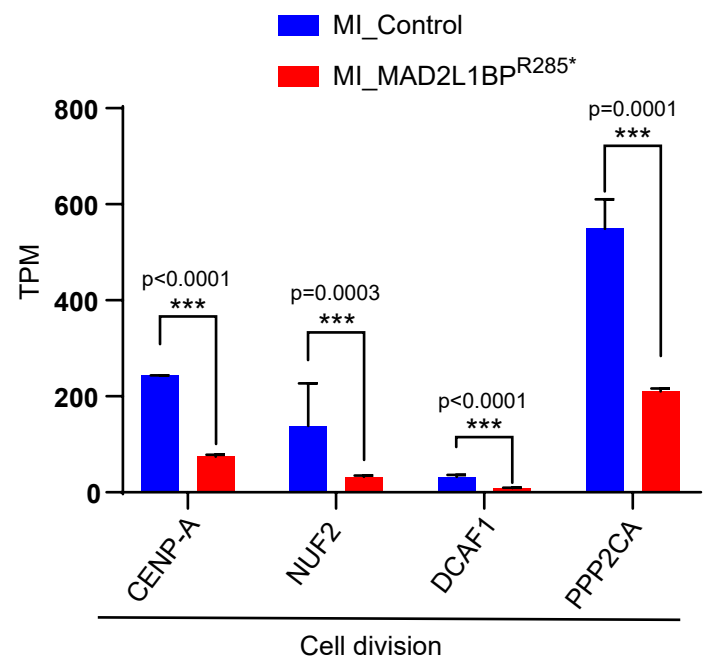

D

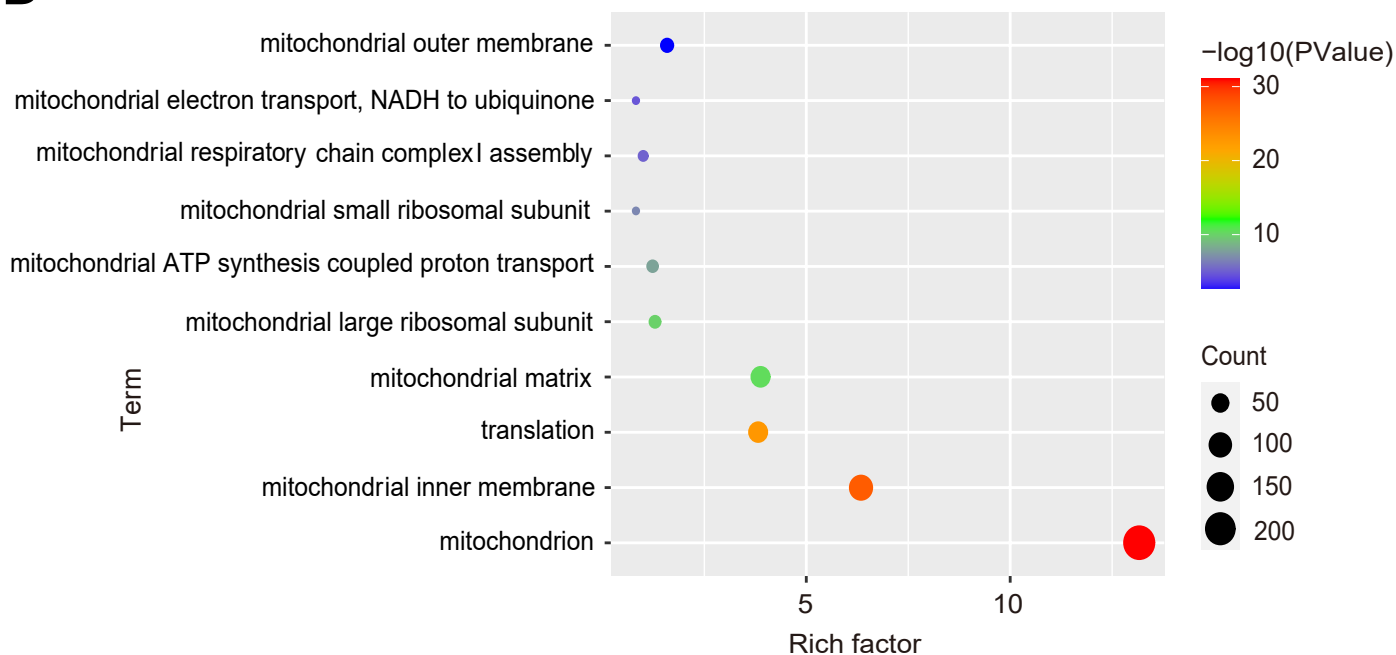

G

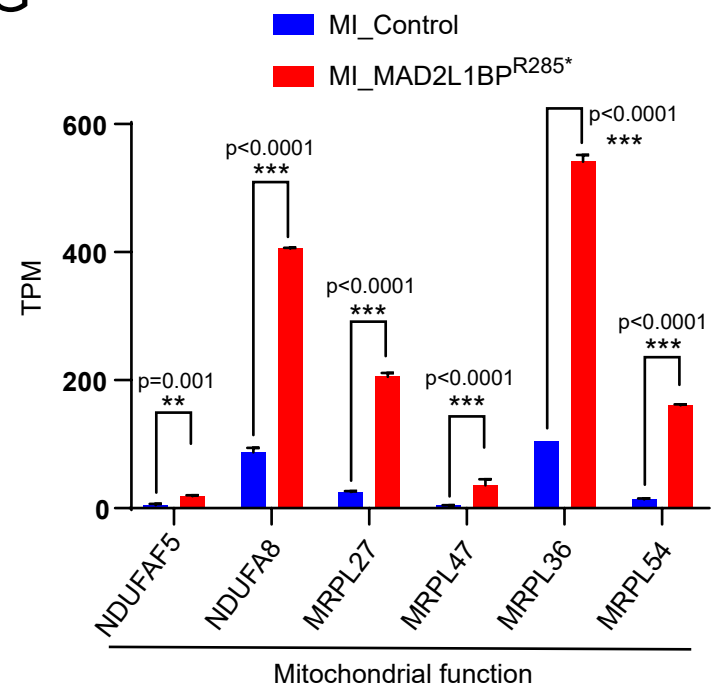

Supplement: supp [file elife-85649-supp-v1.zip]

A

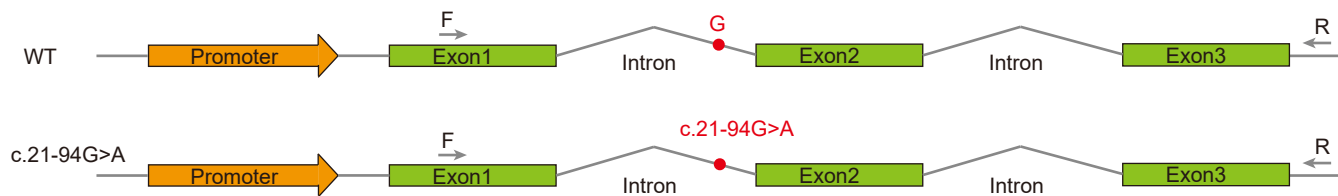

B

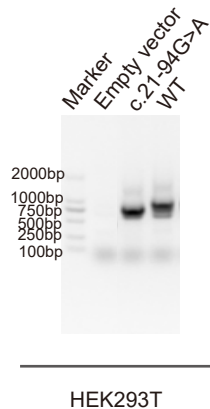

C

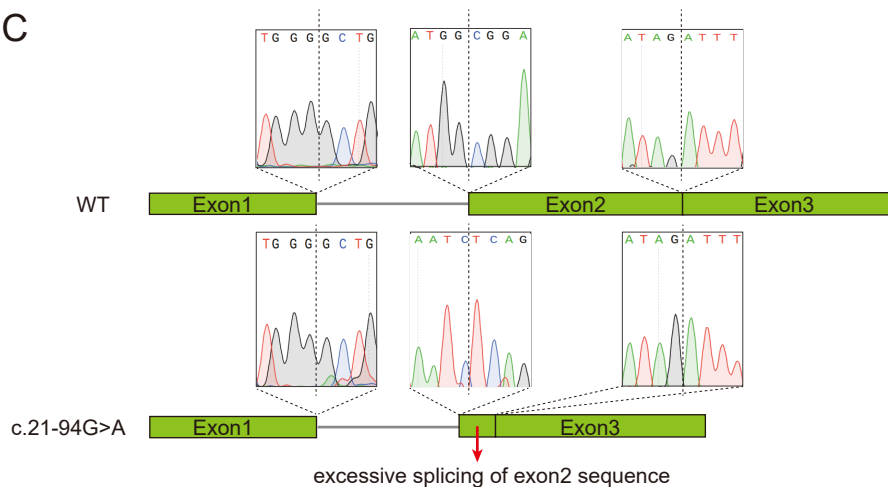

Supplement: supp [file elife-85649-supp-v1.zip]

A

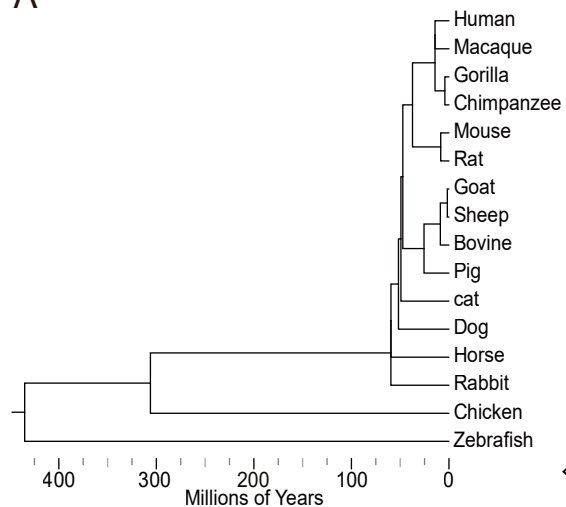

B

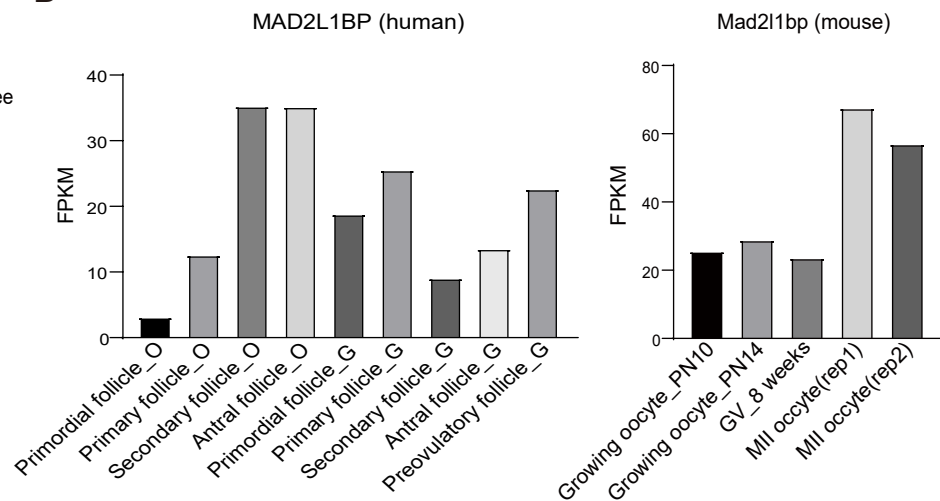

C

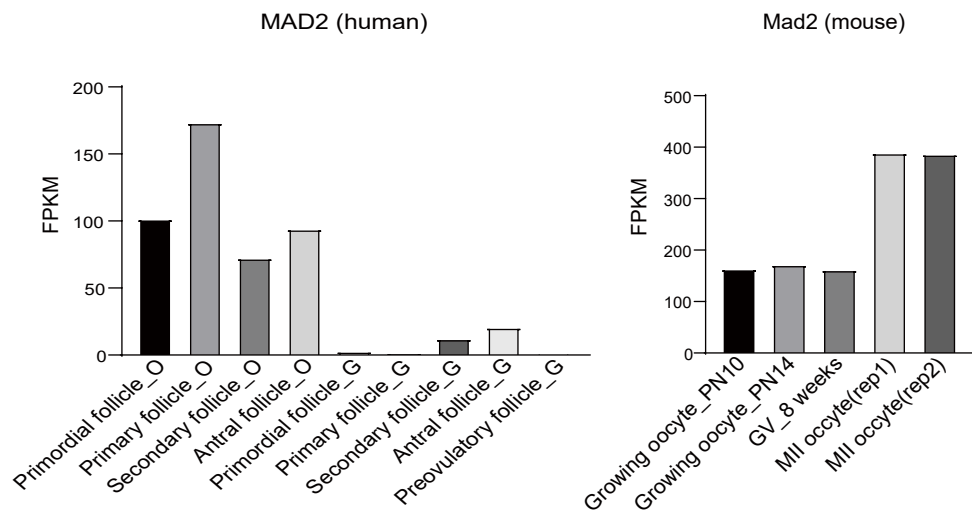

Supplement: supp [file elife-85649-supp-v1.zip]
